# Supplementary material for: Perturbation Analysis of Calcium, Alkalinity and Secretion during Growth of Lily Pollen Tubes
Source: Plants (Basel). 2016 Dec 30;6(1):3. doi: 10.3390/plants6010003 (PMC5371762; doi:10.3390/plants6010003)
Supplement: Supplementary file 1 [file plants-06-00003-s001.zip]

Archive with 5 entries (5 files):
- plants-161701-supplymentary.pdf
- Video 1 NADH (binned) KCN timer scale KCN tag.avi
- Video 2 Calcium (fura) KCN 322 smaller scale timer KCN tag.avi
- Video 3 pH (bcecf) KCN 607 KCN tag timer scale.avi
- Video 4 PI KCN inhibition timer scale KCN tag.avi
